# Supplementary material for: Docosahexaenoic acid-enriched phospholipids and eicosapentaenoic acid-enriched phospholipids inhibit tumor necrosis factor-alpha-induced lipolysis in 3T3-L1 adipocytes by activating sirtuin 1 pathways
Source: Royal Society of Chemistry journal article supplement (doi:10.1039/d1fo00157d), 2021-01-01
Supplement: d1fo00157d1.pdf [file d1fo00157d1.pdf]

## Supporting information

**Table S1** Fatty acid composition of DHA-PL and EPA-PL. Values are expressed as mean  $\pm$  SEM (n=3).

**Figure S1** Cell viability of 3T3-L1 adipocytes treated with different concentrations of DHA-PL and EPA-PL in the absence or presence of TNF- $\alpha$ , EX-527 or compound C. The cell viability of 3T3-L1 adipocytes treated with (A) DHA-PL and (B) EPA-PL was determined using WST-1 assay. Values are expressed as mean  $\pm$  SEM (n = 4).

**Figure S2** Co-treatment of compound C does not alter the activation of SIRT1 by DHA-PL or EPA-PL treatment. (A) DHA-PL and EPA-PL enhanced SIRT1 deacetylase activity in TNF- $\alpha$ -treated 3T3-L1 adipocytes, which was not abolished by co-treatment of compound C. (B) DHA-PL and EPA-PL increased SIRT1 protein expression in TNF- $\alpha$ -treated 3T3-L1 adipocytes, which was not blocked by co-treatment of compound C. Data normalization was accomplished using the endogenous reference  $\beta$ -actin. Values are expressed as mean  $\pm$  SEM (n = 4),  $^{\#}P < 0.05$ ,  $^{\#\#}P < 0.01$  as compared to control group;  $^*P < 0.05$ ,  $^{**}P < 0.01$  as compared to TNF- $\alpha$  group.

**Figure S3** Effects of DHA-PL and EPA-PL on mRNA expression of lipolysis genes in 3T3-L1 adipocytes in the absence or presence of TNF- $\alpha$ . The mRNA expression of (A) C/EBP  $\alpha$ , (B) C/EBP  $\beta$ , (C) PPAR  $\gamma$  and (D) SREBP-1c in 3T3-L1 adipocytes were measured by real-time PCR. Data normalization was accomplished using the endogenous reference  $\beta$ -actin. Values are expressed as mean  $\pm$  SEM (n = 4),  $^{\#}P < 0.05$ ,  $^{\#\#}P < 0.01$  as compared to control group;  $^*P < 0.05$ ,  $^{**}P < 0.01$  as compared to TNF- $\alpha$  group.

**Figure S4** Glucose uptake of 3T3-L1 adipocytes treated with various concentrations of DHA-PL and EPA-PL in the absence or presence of TNF- $\alpha$ . The glucose uptake of 3T3-L1 adipocytes treated with (A) DHA-PL and (B) EPA-PL were evaluated by using glucose uptake cell-based assay kit following the manufacturer's instruction and normalized by the amount of protein. Values are expressed as mean  $\pm$  SEM (n = 4),  $^{\#}P < 0.05$ ,  $^{\#\#}P < 0.01$  as compared to control group;  $^*P < 0.05$ ,  $^{**}P < 0.01$  as compared to TNF- $\alpha$  group.

**Table S1** Fatty acid composition of DHA-PL and EPA-PL.

| Fatty acid <sup>&amp;</sup> | DHA-PL       | EPA-PL       |
|-----------------------------|--------------|--------------|
| C14:0                       | 3.11 ± 0.04  | 4.34 ± 0.01  |
| C16:0                       | 16.85 ± 0.43 | 13.78 ± 0.23 |
| C16:1                       | 2.67 ± 0.04  | 4.27 ± 0.02  |
| C18:0                       | 13.45 ± 0.35 | 11.58 ± 0.57 |
| C18:1                       | 7.66 ± 0.30  | 6.15 ± 0.31  |
| C18:2                       | 0.12 ± 0.01  | 0.45 ± 0.02  |
| C18:3 n-3                   | 0.24 ± 0.01  | 0.68 ± 0.01  |
| C20:1                       | 5.68 ± 0.21  | 7.88 ± 0.26  |
| C20:2                       | 0.54 ± 0.01  | -            |
| C20:3                       | 0.11 ± 0.01  | -            |
| C20:4 (AA)                  | 2.43 ± 0.08  | 4.79 ± 0.18  |
| C20:5 (EPA)                 | 8.88 ± 0.25  | 41.96 ± 0.89 |
| C22:6 (DHA)                 | 38.26 ± 0.65 | 4.12 ± 0.42  |
| n-3 PUFAs                   | 47.38        | 46.76        |

<sup>&</sup> Note: %/total fatty acids. Values are expressed as mean ± SEM (n = 3).

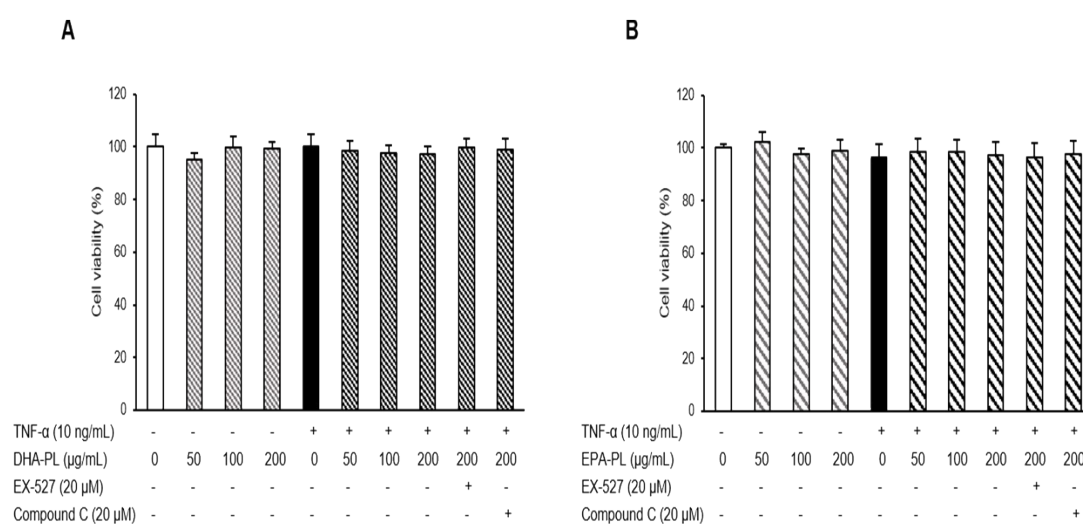

**Figure S1** Cell viability of 3T3-L1 adipocytes treated with different concentrations of DHA-PL and EPA-PL in the absence or presence of TNF- $\alpha$ , EX-527 or compound C.

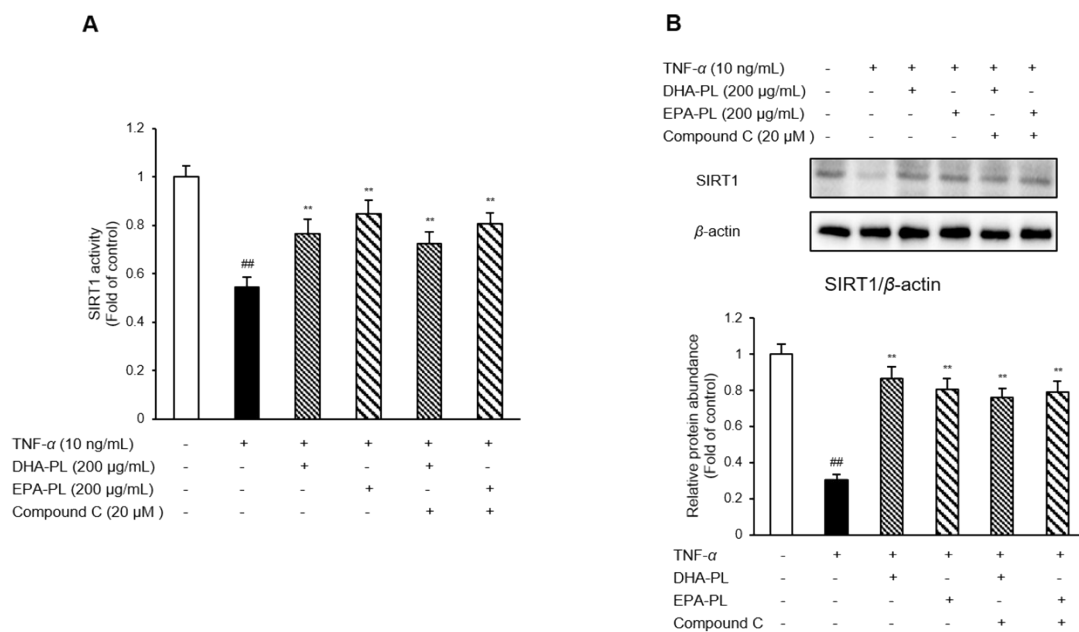

**Figure S2** Co-treatment of compound C does not alter the activation of SIRT1 by DHA-PL or EPA-PL treatment.

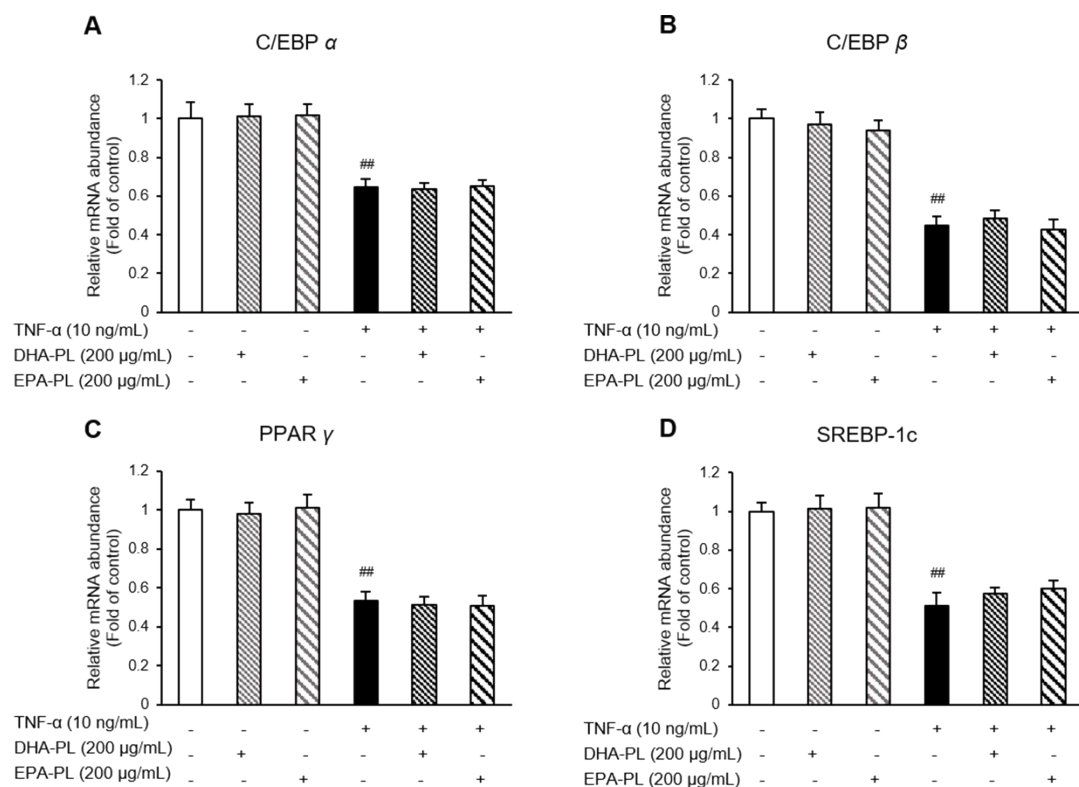

**Figure S3** Effects of DHA-PL and EPA-PL on mRNA expression of lipolysis genes in 3T3-L1 adipocytes in the absence or presence of TNF- $\alpha$ .

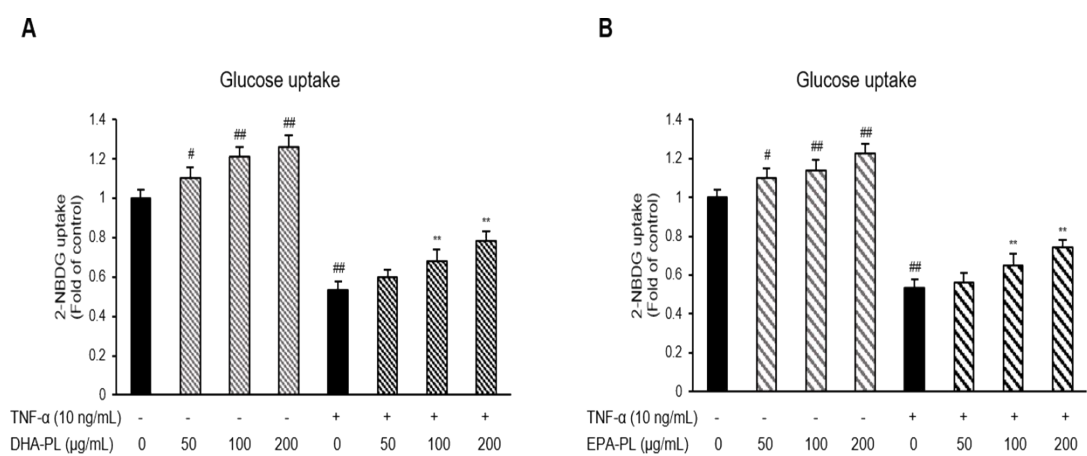

**Figure S4** Glucose uptake of 3T3-L1 adipocytes treated with various concentrations of DHA-PL and EPA-PL in the absence or presence of TNF- $\alpha$ .
